# Supplementary material
Source: PubMed Central journal article supplement (PMC540043)
Supplement: nar_33_suppl-1_D125__1.pdf [file nar_33_suppl-1_D125__1.pdf]

## Supplementary materials 1: References for individual ncRNAs

Ordered as appears in text.

| ncRNA         | Reference(s)                                                                                                                                                                                                                                                                                                                                                                                                                                                                                                                                                                                                                                                                                                                                                                                                                                                                                                                                                                                                                                                                                                           |
|---------------|------------------------------------------------------------------------------------------------------------------------------------------------------------------------------------------------------------------------------------------------------------------------------------------------------------------------------------------------------------------------------------------------------------------------------------------------------------------------------------------------------------------------------------------------------------------------------------------------------------------------------------------------------------------------------------------------------------------------------------------------------------------------------------------------------------------------------------------------------------------------------------------------------------------------------------------------------------------------------------------------------------------------------------------------------------------------------------------------------------------------|
| lin-4         | Lee, R.C., Feinbaum, R.L. and Ambros, V. (1993) The <i>C. elegans</i> heterochronic gene <i>lin-4</i> encodes small RNAs with antisense complementarity to <i>lin-14</i> . <i>Cell</i> , 75, 843-854.                                                                                                                                                                                                                                                                                                                                                                                                                                                                                                                                                                                                                                                                                                                                                                                                                                                                                                                  |
| Xist          | <p>Borsani, G., Tonlorenzi, R., Simmler, M.C., Dandolo, L., Arnaud, D., Capra, V., Grompe, M., Pizzuti, A., Muzny, D., Lawrence, C. et al. (1991) Characterization of a murine gene expressed from the inactive X chromosome. <i>Nature</i>, 351, 325-329.</p> <p>Brockdorff, N., Ashworth, A., Kay, G.F., Cooper, P., Smith, S., McCabe, V.M., Norris, D.P., Penny, G.D., Patel, D. and Rastan, S. (1991) Conservation of position and exclusive expression of mouse <i>Xist</i> from the inactive X chromosome. <i>Nature</i>, 351, 329-331.</p> <p>Brockdorff, N., Ashworth, A., Kay, G.F., McCabe, V.M., Norris, D.P., Cooper, P.J., Swift, S. and Rastan, S. (1992) The product of the mouse <i>Xist</i> gene is a 15 kb inactive X-specific transcript containing no conserved ORF and located in the nucleus. <i>Cell</i>, 71, 515-526.</p> <p>Brown, C.J., Ballabio, A., Rupert, J.L., Lafreniere, R.G., Grompe, M., Tonlorenzi, R. and Willard, H.F. (1991) A gene from the region of the human X inactivation centre is expressed exclusively from the inactive X chromosome. <i>Nature</i>, 349, 38-44.</p> |
| IPW           | <p>Wevrick, R., Kerns, J.A. and Francke, U. (1994) Identification of a novel paternally expressed gene in the Prader-Willi syndrome region. <i>Hum. Mol. Genet.</i>, 3, 1877-1882.</p> <p>Wevrick, R. and Francke, U. (1997) An imprinted mouse transcript homologous to the human imprinted in Prader-Willi syndrome (IPW) gene. <i>Hum. Mol. Genet.</i>, 6, 325-332.</p>                                                                                                                                                                                                                                                                                                                                                                                                                                                                                                                                                                                                                                                                                                                                             |
| NTT           | Liu, A.Y., Torchia, B.S., Migeon, B.R. and Siliciano, R.F. (1997) The human NTT gene: identification of a novel 17-kb noncoding nuclear RNA expressed in activated CD4+ T cells. <i>Genomics</i> , 39, 171-184.                                                                                                                                                                                                                                                                                                                                                                                                                                                                                                                                                                                                                                                                                                                                                                                                                                                                                                        |
| BC200         | Tiedge, H., Chen, W. and Brosius, J. (1993) Primary structure, neural-specific expression, and dendritic location of human BC200 RNA. <i>J. Neurosci.</i> , 13, 2382-2390.                                                                                                                                                                                                                                                                                                                                                                                                                                                                                                                                                                                                                                                                                                                                                                                                                                                                                                                                             |
| miR-15 and 16 | Calin, G.A., Sevignani, C., Dumitru, C.D., Hyslop, T., Noch, E., Yendamuri, S., Shimizu, M., Rattan, S., Bullrich, F., Negrini, M. et al. (2004) Human microRNA genes are frequently located at fragile sites and genomic regions involved in cancers. <i>Proc. Natl. Acad. Sci. USA</i> , 101, 2999-3004.                                                                                                                                                                                                                                                                                                                                                                                                                                                                                                                                                                                                                                                                                                                                                                                                             |

|               |                                                                                                                                                                                                                                                                                                                                                                                                                                                                                                                                                   |
|---------------|---------------------------------------------------------------------------------------------------------------------------------------------------------------------------------------------------------------------------------------------------------------------------------------------------------------------------------------------------------------------------------------------------------------------------------------------------------------------------------------------------------------------------------------------------|
| BCMS          | Wolf, S., Mertens, D., Schaffner, C., Korz, C., Dohner, H., Stilgenbauer, S. and Lichter, P. (2001), <i>Hum. Mol. Genet.</i> , Vol. 10, pp. 1275-1285.                                                                                                                                                                                                                                                                                                                                                                                            |
| TTY1 and TTY2 | Stuppia, L., Gatta, V., Fogh, I., Gaspari, A.R., Grande, R., Morizio, E., Fantasia, D., Pizzuti, A., Calabrese, G. and Palka, G. (2000) Characterization of novel genes in AZF regions. <i>J. Endocrinol. Invest.</i> , 23, 659-663.                                                                                                                                                                                                                                                                                                              |
| NCRMS         | Chan, A.S., Thorner, P.S., Squire, J.A. and Zielenska, M. (2002) Identification of a novel gene NCRMS on chromosome 12q21 with differential expression between rhabdomyosarcoma subtypes. <i>Oncogene.</i> , 21, 3029-3037.                                                                                                                                                                                                                                                                                                                       |
| BIC           | Tam, W., Ben-Yehuda, D. and Hayward, W.S. (1997) <i>bic</i> , a novel gene activated by proviral insertions in avian leukosis virus-induced lymphomas, is likely to function through its noncoding RNA. <i>Mol. Cell Biol.</i> , 17, 1490-1502.                                                                                                                                                                                                                                                                                                   |
| H19           | DeBaun, M.R., Niemitz, E.L., McNeil, D.E., Brandenburg, S.A., Lee, M.P. and Feinberg, A.P. (2002) Epigenetic alterations of H19 and LIT1 distinguish patients with Beckwith-Wiedemann syndrome with cancer and birth defects. <i>Am. J. Hum. Genet.</i> , 70, 604-611.<br><br>Lottin, S., Adriaenssens, E., Dupressoir, T., Berteaux, N., Montpellier, C., Coll, J., Dugimont, T. and Curgy, J.J. (2002) Overexpression of an ectopic H19 gene enhances the tumorigenic properties of breast cancer cells. <i>Carcinogenesis</i> , 23, 1885-1895. |
| MALAT-1       | Ji, P., Diederichs, S., Wang, W., Boing, S., Metzger, R., Schneider, P.M., Tidow, N., Brandt, B., Buerger, H., Bulk, E. et al. (2003) MALAT-1, a novel noncoding RNA, and thymosin beta4 predict metastasis and survival in early-stage non-small cell lung cancer. <i>Oncogene</i> , 22, 6087-6097.                                                                                                                                                                                                                                              |
| DISC2         | Millar, J.K., Wilson-Annan, J.C., Anderson, S., Christie, S., Taylor, M.S., Semple, C.A., Devon, R.S., Clair, D.M., Muir, W.J., Blackwood, D.H. et al. (2000) Disruption of two novel genes by a translocation co-segregating with schizophrenia. <i>Hum. Mol. Genet.</i> , 9, 1415-1423.                                                                                                                                                                                                                                                         |
| SCA8          | Nemes, J.P., Benzow, K.A., Moseley, M.L., Ranum, L.P. and Koob, M.D. (2000) The SCA8 transcript is an antisense RNA to a brain-specific transcript encoding a novel actin-binding protein (KLHL1). <i>Hum. Mol. Genet.</i> , 9, 1543-1551.                                                                                                                                                                                                                                                                                                        |
| ST7OT1-4      | Vincent, J.B., Petek, E., Thevarkunnel, S., Kolozsvari, D., Cheung, J., Patel, M. and Scherer, S.W. (2002) The RAY1/ST7 tumor-suppressor locus on chromosome 7q31 represents a complex multi-transcript system. <i>Genomics</i> , 80, 283-294.                                                                                                                                                                                                                                                                                                    |
| LIT-1         | DeBaun, M.R., Niemitz, E.L., McNeil, D.E., Brandenburg, S.A., Lee, M.P. and Feinberg, A.P. (2002) Epigenetic alterations of H19 and LIT1 distinguish patients with Beckwith-Wiedemann syndrome with cancer and birth defects. <i>Am. J. Hum. Genet.</i> , 70, 604-611.                                                                                                                                                                                                                                                                            |

|                   |                                                                                                                                                                                                                                                                                                                                               |
|-------------------|-----------------------------------------------------------------------------------------------------------------------------------------------------------------------------------------------------------------------------------------------------------------------------------------------------------------------------------------------|
|                   | Mitsuya, K., Meguro, M., Lee, M.P., Katoh, M., Schulz, T.C., Kugoh, H., Yoshida, M.A., Niikawa, N., Feinberg, A.P. and Oshimura, M. (1999) LIT1, an imprinted antisense RNA in the human KvLQT1 locus identified by screening for differentially expressed transcripts using monochromosomal hybrids. <i>Hum. Mol. Genet.</i> , 8, 1209-1217. |
| RMRP              | Ridanpaa, M., van Eenennaam, H., Pelin, K., Chadwick, R., Johnson, C., Yuan, B., vanVenrooij, W., Pruijn, G., Salmela, R., Rockas, S. et al. (2001) Mutations in the RNA component of RNase MRP cause a pleiotropic human disease, cartilage-hair hypoplasia. <i>Cell</i> , 104, 195-203.                                                     |
| UBE3A antisense   | Rougeulle, C., Cardoso, C., Fontes, M., Colleaux, L. and Lalonde, M. (1998) An imprinted antisense RNA overlaps UBE3A and a second maternally expressed transcript. <i>Nat. Genet.</i> , 19, 15-16.                                                                                                                                           |
| 7H4               | Velleca, M.A., Wallace, M.C. and Merlie, J.P. (1994) A novel synapse-associated noncoding RNA. <i>Mol. Cell Biol.</i> , 14, 7095-7104.                                                                                                                                                                                                        |
| BC1               | Martignetti, J.A. and Brosius, J. (1995) BC1 RNA: transcriptional analysis of a neural cell-specific RNA polymerase III transcript. <i>Mol. Cell Biol.</i> , 15, 1642-1650.                                                                                                                                                                   |
| BORG              | Takeda, K., Ichijo, H., Fujii, M., Mochida, Y., Saitoh, M., Nishitoh, H., Sampath, T.K. and Miyazono, K. (1998) Identification of a novel bone morphogenetic protein-responsive gene that may function as a noncoding RNA. <i>J. Biol. Chem.</i> , 273, 17079-17085.                                                                          |
| Bsr               | Komine, Y., Tanaka, N.K., Yano, R., Takai, S., Yuasa, S., Shiroishi, T., Tsuchiya, K. and Yamamori, T. (1999) A novel type of non-coding RNA expressed in the rat brain. <i>Brain Research. Molecular Brain Research.</i> , 66, 1-13.                                                                                                         |
| CIOR              | Inoue, A., Kobayashi, Y., Ishizuka, M., Hirose, S. and Hagiwara, H. (2002) Identification of a novel osteoblastic gene, inducible by C-type natriuretic peptide, whose transcript might function in mineralization as a noncoding RNA. <i>Calcified Tissue International.</i> , 70, 111-116.                                                  |
| MBII-13/52 and 85 | Cavaille, J., Buiting, K., Kieffmann, M., Lalonde, M., Brannan, C.I., Horsthemke, B., Bachellerie, J.P., Brosius, J. and Huttenhofer, A. (2000) Identification of brain-specific and imprinted small nucleolar RNA genes exhibiting an unusual genomic organization.[comment]. <i>Proc. Natl. Acad. Sci. U S A</i> , 97, 14311-14316.         |
| Ntab              | French, P.J., Bliss, T.V. and O'Connor, V. (2001) Ntab, a novel non-coding RNA abundantly expressed in rat brain. <i>Neuroscience</i> , 108, 207-215.                                                                                                                                                                                         |
| tncb              | Hwang, I. and Gottlieb, P.D. (1997) The Bop gene adjacent to the mouse CD8b gene encodes distinct zinc-finger proteins expressed in CTLs and in muscle. <i>J. Immunol.</i> , 158, 1165-1174.                                                                                                                                                  |

|                |                                                                                                                                                                                                                                                                                                                                                                            |
|----------------|----------------------------------------------------------------------------------------------------------------------------------------------------------------------------------------------------------------------------------------------------------------------------------------------------------------------------------------------------------------------------|
| Zim3           | Kim, J., Bergmann, A., Wehri, E., Lu, X. and Stubbs, L. (2001) Imprinting and evolution of two Kruppel-type zinc-finger genes, ZIM3 and ZNF264, located in the PEG3/USP29 imprinted domain. <i>Genomics</i> , 77, 91-98.                                                                                                                                                   |
| aHIF           | Thrash-Bingham, C.A. and Tartof, K.D. (1999) aHIF: a natural antisense transcript overexpressed in human renal cancer and during hypoxia. <i>J. Natl. Cancer Inst.</i> , 91, 143-151.                                                                                                                                                                                      |
| Air            | Lyle, R., Watanabe, D., te Vruchte, D., Lerchner, W., Smrzka, O.W., Wutz, A., Schageman, J., Hahner, L., Davies, C. and Barlow, D.P. (2000) The imprinted antisense RNA at the Igf2r locus overlaps but does not imprint Mas1. <i>Nat. Genet.</i> , 25, 19-21.                                                                                                             |
| EMX2OS         | Noonan, F.C., Goodfellow, P.J., Staloch, L.J., Mutch, D.G. and Simon, T.C. (2003) Antisense transcripts at the EMX2 locus in human and mouse. <i>Genomics</i> , 81, 58-66.                                                                                                                                                                                                 |
| FGF antisense  | Li, A.W. and Murphy, P.R. (2000) Expression of alternatively spliced FGF-2 antisense RNA transcripts in the central nervous system: regulation of FGF-2 mRNA translation. <i>Mol. Cell Endocrinol.</i> , 170, 233-242.                                                                                                                                                     |
| HFE antisense  | Thenie, A.C., Gicquel, I.M., Hardy, S., Ferran, H., Fergelot, P., Le Gall, J.Y. and Mosser, J. (2001) Identification of an endogenous RNA transcribed from the antisense strand of the HFE gene. <i>Hum. Mol. Genet.</i> , 10, 1859-1866.                                                                                                                                  |
| HOXA11S        | Hsieh-Li, H.M., Witte, D.P., Weinstein, M., Branford, W., Li, H., Small, K. and Potter, S.S. (1995) Hoxa 11 structure, extensive antisense transcription, and function in male and female fertility. <i>Development</i> , 121, 1373-1385.                                                                                                                                  |
| Msx1 antisense | Blin-Wakkach, C., Lezot, F., Ghoul-Mazgar, S., Hotton, D., Monteiro, S., Teillaud, C., Pibouin, L., Orestes-Cardoso, S., Papagerakis, P., Macdougall, M. et al. (2001) Endogenous Msx1 antisense transcript: in vivo and in vitro evidences, structure, and potential involvement in skeleton development in mammals. <i>Proc. Natl. Acad. Sci. U S A</i> , 98, 7336-7341. |
| Nespas         | Williamson, C.M., Skinner, J.A., Kelsey, G. and Peters, J. (2002) Alternative non-coding splice variants of Nespas, an imprinted gene antisense to Nesp in the Gnas imprinting cluster. <i>Mamm. Genome</i> , 13, 74-79.                                                                                                                                                   |
| Makorin1-p1    | Hirotsune, S., Yoshida, N., Chen, A., Garrett, L., Sugiyama, F., Takahashi, S., Yagami, K., Wynshaw-Boris, A. and Yoshiki, A. (2003) An expressed pseudogene regulates the messenger-RNA stability of its homologous coding gene. <i>Nature</i> , 423, 91-96.                                                                                                              |
| PWCR1          | de los Santos, T., Schweizer, J., Rees, C.A. and Francke, U. (2000) Small evolutionarily conserved RNA, resembling C/D box small nucleolar RNA, is transcribed from PWCR1, a novel imprinted gene in the Prader-Willi deletion region, which is highly expressed in brain. <i>Am. J. Hum. Genet.</i> , 67, 1067-1082.                                                      |

|                  |                                                                                                                                                                                                                                                                                                                                                                                         |
|------------------|-----------------------------------------------------------------------------------------------------------------------------------------------------------------------------------------------------------------------------------------------------------------------------------------------------------------------------------------------------------------------------------------|
| PAR1             | Sutcliffe, J.S., Nakao, M., Christian, S., Orstavik, K.H., Tommerup, N., Ledbetter, D.H. and Beaudet, A.L. (1994) Deletions of a differentially methylated CpG island at the SNRPN gene define a putative imprinting control region. <i>Nat. Genet.</i> , 8, 52-58.                                                                                                                     |
| PEG13            | Smith, R.J., Dean, W., Konfortova, G. and Kelsey, G. (2003) Identification of novel imprinted genes in a genome-wide screen for maternal methylation. <i>Genome Res.</i> , 13, 558-569.                                                                                                                                                                                                 |
| PEG-11 antisense | Charlier, C., Segers, K., Wagenaar, D., Karim, L., Berghmans, S., Jaillon, O., Shay, T., Weissenbach, J., Cockett, N., Gyapay, G. et al. (2001) Human-ovine comparative sequencing of a 250-kb imprinted domain encompassing the callipyge (clpg) locus and identification of six imprinted transcripts: DLK1, DAT, GTL2, PEG11, antiPEG11, and MEG8. <i>Genome Res.</i> , 11, 850-862. |
| MEG8             | Charlier, C., Segers, K., Wagenaar, D., Karim, L., Berghmans, S., Jaillon, O., Shay, T., Weissenbach, J., Cockett, N., Gyapay, G. et al. (2001) Human-ovine comparative sequencing of a 250-kb imprinted domain encompassing the callipyge (clpg) locus and identification of six imprinted transcripts: DLK1, DAT, GTL2, PEG11, antiPEG11, and MEG8. <i>Genome Res.</i> , 11, 850-862. |
| GNAS1 antisense  | Hayward, B.E. and Bonthron, D.T. (2000) An imprinted antisense transcript at the human GNAS1 locus. <i>Hum. Mol. Genet.</i> , 9, 835-841.                                                                                                                                                                                                                                               |
| PEG8             | Okutsu, T., Kuroiwa, Y., Kagitani, F., Kai, M., Aisaka, K., Tsutsumi, O., Kaneko, Y., Yokomori, K., Surani, M.A., Kohda, T. et al. (2000) Expression and imprinting status of human PEG8/IGF2AS, a paternally expressed antisense transcript from the IGF2 locus, in Wilms' tumors. <i>J. Biochem. (Tokyo)</i> , 127, 475-483.                                                          |
| Copg2IT1         | Yamasaki, K., Hayashida, S., Miura, K., Masuzaki, H., Ishimaru, T., Niikawa, N. and Kishino, T. (2000) The novel gene, gamma2-COP (COPG2), in the 7q32 imprinted domain escapes genomic imprinting. <i>Genomics</i> , 68, 330-335.                                                                                                                                                      |
| PEG1 antisense   | Li, T., Vu, T.H., Lee, K.O., Yang, Y., Nguyen, C.V., Bui, H.Q., Zeng, Z.L., Nguyen, B.T., Hu, J.F., Murphy, S.K. et al. (2002) An imprinted PEG1/MEST antisense expressed predominantly in human testis and in mature spermatozoa. <i>J. Biol. Chem.</i> , 277, 13518-13527.                                                                                                            |
| DD3              | Bussemakers, M.J., van Bokhoven, A., Verhaegh, G.W., Smit, F.P., Karthaus, H.F., Schalken, J.A., Debruyne, F.M., Ru, N. and Isaacs, W.B. (1999) DD3: a new prostate-specific gene, highly overexpressed in prostate cancer. <i>Cancer Res.</i> , 59, 5975-5979.                                                                                                                         |
| DGCR5            | Sutherland, H.F., Wadey, R., McKie, J.M., Taylor, C., Atif, U., Johnstone, K.A., Halford, S., Kim, U.J., Goodship, J., Baldini, A. et al. (1996) Identification of a novel transcript disrupted by a balanced translocation associated with DiGeorge syndrome. <i>Am. J. Hum. Genet.</i> , 59, 23-31.                                                                                   |

|         |                                                                                                                                                                                                                                                                                                     |
|---------|-----------------------------------------------------------------------------------------------------------------------------------------------------------------------------------------------------------------------------------------------------------------------------------------------------|
| Enox    | Johnston, C.M., Newall, A.E., Brockdorff, N. and Nesterova, T.B. (2002) Enox, a novel gene that maps 10 kb upstream of Xist and partially escapes X inactivation. <i>Genomics.</i> , 80, 236-244.                                                                                                   |
| G.B7    | Ginger, M.R., Gonzalez-Rimbau, M.F., Gay, J.P. and Rosen, J.M. (2001) Persistent changes in gene expression induced by estrogen and progesterone in the rat mammary gland. <i>Molecular Endocrinology</i> , 15, 1993-2009.                                                                          |
| Gas5    | Raho, G., Barone, V., Rossi, D., Philipson, L. and Sorrentino, V. (2000) The gas 5 gene shows four alternative splicing patterns without coding for a protein. <i>Gene</i> , 256, 13-17.                                                                                                            |
| GTL2    | Bidwell, C.A., Shay, T.L., Georges, M., Beever, J.E., Berghmans, S. and Cockett, N.E. (2001) Differential expression of the GTL2 gene within the callipyge region of ovine chromosome 18. <i>Animal Genetics</i> , 32, 248-256.                                                                     |
| Tmevpg1 | Vigneau, S., Levillayer, F., Crespeau, H., Cattolico, L., Caudron, B., Bihl, F., Robert, C., Brahic, M., Weissenbach, J. and Bureau, J.F. (2001) Homology between a 173-kb region from mouse chromosome 10, telomeric to the Ifng locus, and human chromosome 12q15. <i>Genomics</i> , 78, 206-213. |
